# Supplementary material for: Evaluation of the Stability of Bacteriophages in Different Solutions Suitable for the Production of Magistral Preparations in Belgium
Source: MDPI journal article supplement (doi:10.3390/v13050865), 2021-05-08
Supplement: s1 [file s1]

## Article

# Evaluation of the stability of bacteriophages in different solutions suitable for the production of magistral preparations in Belgium

Hans Duyvejonck <sup>1,2</sup>, Maya Merabishvili <sup>2,3</sup>, Mario Vaneechoutte <sup>2</sup>, Steven de Soir <sup>3</sup>, Rosanna Wright <sup>4,5</sup>, Ville-Petri Friman <sup>4</sup>, Gilbert Verbeken <sup>3</sup>, Daniel De Vos <sup>3</sup>, Jean-Paul Pirnay <sup>3</sup>, Els Van Mechelen <sup>1</sup> and Stefan J. T. Vermeulen <sup>1,\*</sup>

<sup>1</sup> Research Center Health & Water Technology, University College Ghent, Keramiekstraat 80, B-9000 Gent, Belgium; Els.vanmechelen@hogent.be (E.V.M.); stefan.vermeulen@hogent.be (S.J.T.V)

<sup>2</sup> Laboratory Bacteriology Research, Faculty of Medicine & Health Sciences, Ghent University, C. Heymanslaan 10, B-9000 Gent, Belgium; mario.vaneechoutte@ugent.be (M.V.)

<sup>3</sup> Laboratory for Molecular and Cellular Technology, Queen Astrid Military Hospital, Bruynstraat 1, 1120, Brussel, Belgium; maia.merabishvili@mil.be (M.M.); steven.desoir@mil.be (S.D.S.); Gilbert.Verbeken@mil.be (G.V.); DanielMarie.DeVos@mil.be (D.D.V.); jean-paul.pirnay@mil.be (J.-P.P)

<sup>4</sup> Department of Biology, University of York, Wentworth Way, York, YO10 5DD, UK; vifriman@gmail.com (V.F.)

<sup>5</sup> Division of Evolution and Genomic Sciences, University of Manchester, Dover Street, Manchester, M13 9PT, UK; rosanna.wright-2@manchester.ac.uk (R.W.)

\* Correspondence: e-mail: stefan.vermeulen@hogent.be (S.J.T.V); 0032 498496997, Research Center Health & Water Technology, University College Ghent, Keramiekstraat 80, B-9000 Gent, Belgium

**Table S1:** Stability over time of the infectivity of different phages, expressed as log pfu/ml stored at 4 °C at two different starting concentrations: 7 log pfu/ml and 9 log pfu/ml.

| Phage      | Storage solution             | Presumed titre pfu/ml | Phage titers (log pfu/ml) after storage period (days) |      |      |      |      |      |      |      |      |      |      |      |      |      |      |
|------------|------------------------------|-----------------------|-------------------------------------------------------|------|------|------|------|------|------|------|------|------|------|------|------|------|------|
|            |                              |                       | 0                                                     | 1    | 3    | 7    | 10   | 14   | 21   | 28   | 34   | 43   | 56   | 64   | 243  | 286  | 554  |
| Acibel 004 | 5% Glucose                   | 9 log                 | 8.89                                                  | 8.01 | 7.43 | 6.94 | NT   | 6.62 | NT   | NT   | 6.69 | 6.73 | NT   | 6.66 | NT   | NT   | NT   |
|            |                              | 7 log                 | 5.97                                                  | 3.31 | NT   | 0*   | NA   |
|            | 0.9 % NaCl                   | 9 log                 | 9.37                                                  | 9.36 | 9.25 | 8.92 | 8.87 | 8.61 | 9.36 | 9.2  | 9.23 | NT   | NT   | NT   | NT   | NT   | 8.99 |
|            |                              | 7 log                 | 7.72                                                  | 7.71 | 7.48 | 7.08 | 6.98 | 6.62 | 6.2  | 5.74 | 5.57 | NT   | NT   | NT   | NT   | NT   | 0*   |
|            | Hartmann's infusion solution | 9 log                 | 9.45                                                  | 9.46 | 9.31 | 9.22 | 9.16 | 9.15 | 9.33 | 9.15 | 9.22 | NT   | NT   | NT   | NT   | NT   | 9.01 |
|            |                              | 7 log                 | 7.79                                                  | 7.7  | 7.45 | 7.11 | 7.08 | 6.76 | 6.28 | 5.9  | 5.7  | NT   | NT   | NT   | NT   | NT   | 1.44 |
|            | DPBS w/ CaMg <sup>2+</sup>   | 9 log                 | 9.46                                                  | 9.43 | 9.33 | 9.38 | 9.3  | 9.24 | 9.35 | 9.22 | 9.31 | NT   | NT   | NT   | NT   | NT   | 9.03 |
|            |                              | 7 log                 | 7.8                                                   | 7.84 | 7.47 | 7.16 | 7.08 | 6.83 | 6.39 | 5.99 | 5.76 | NT   | NT   | NT   | NT   | NT   | 1.33 |
|            | DPBS w/o CaMg <sup>2+</sup>  | 9 log                 | 9.44                                                  | 9.43 | 9.36 | 9.38 | 9.35 | 9.26 | 9.33 | 9.19 | 9.29 | NT   | NT   | NT   | NT   | NT   | 8.95 |
|            |                              | 7 log                 | 7.62                                                  | 7.67 | 7.39 | 7.08 | 7.01 | 6.75 | 6.41 | 5.91 | 5.67 | NT   | NT   | NT   | NT   | NT   | 1.83 |
| PNM        | 5% Glucose                   | 9 log                 | 0*                                                    | NA   |
|            |                              | 7 log                 | 0*                                                    | NA   |
|            | 0.9 % NaCl                   | 9 log                 | 9.20                                                  | 9.65 | 9.28 | 9.16 | 8.56 | 9.43 | 9.18 | NT   | 9.20 | NT   | NT   | NT   | NT   | 7.95 | NT   |
|            |                              | 7 log                 | 7.28                                                  | 7.09 | 6.56 | 6.70 | 6.08 | 6.03 | 5.39 | NT   | 3.80 | NT   | NT   | NT   | NT   | NT   | NT   |
|            | Hartmann's infusion solution | 9 log                 | 9.40                                                  | 9.18 | 9.00 | 9.15 | 8.47 | 8.84 | 8.79 | NT   | 9.01 | NT   | NT   | NT   | NT   | 7.05 | NT   |
|            |                              | 7 log                 | 7.55                                                  | 6.95 | 6.94 | 6.72 | 6.21 | 5.89 | 5.22 | NT   | 3.52 | NT   | NT   | NT   | NT   | NT   | NT   |
|            | DPBS w/ CaMg <sup>2+</sup>   | 9 log                 | 9.52                                                  | 9.14 | 9.20 | 9.10 | 8.95 | 9.02 | 8.89 | NT   | 8.97 | NT   | NT   | NT   | NT   | 9.06 | NT   |
|            |                              | 7 log                 | 7.41                                                  | 7.15 | 6.93 | 6.63 | 6.53 | 5.88 | 5.28 | NT   | 3.84 | NT   | NT   | NT   | NT   | NT   | NT   |
|            | DPBS w/o CaMg <sup>2+</sup>  | 9 log                 | 9.04                                                  | 9.13 | 9.34 | 9.43 | 9.33 | 9.46 | 9.14 | NT   | 9.18 | NT   | NT   | NT   | NT   | 9.36 | NT   |
|            |                              | 7 log                 | 7.18                                                  | 7.17 | 6.62 | 6.50 | 6.70 | 6.08 | 5.38 | NT   | 4.33 | NT   | NT   | NT   | NT   | NT   | NT   |
| 14/1       | 5% Glucose                   | 9 log                 | 9.83                                                  | 8.91 | NT   | NT   | NT   | 7.75 | NT   | 3.60 | NT   | NT   | 2.24 | NT   | 0*   | NT   | NT   |
|            |                              | 7 log                 | 7.41                                                  | 6.76 | NT   | NT   | NT   | 4.53 | NT   | 2.09 | NT   | NT   | 0*   | NA   | NA   | NA   | NA   |
|            | 0.9 % NaCl                   | 9 log                 | 9.80                                                  | 9.21 | NT   | NT   | NT   | 9.27 | NT   | 8.62 | NT   | NT   | 8.39 | NT   | 7.69 | NT   | NT   |
|            |                              | 7 log                 | 7.32                                                  | 6.92 | NT   | NT   | NT   | 7.10 | NT   | 6.44 | NT   | NT   | 5.28 | NT   | 2.39 | NT   | NT   |
|            | Hartmann's infusion solution | 9 log                 | 9.84                                                  | 9.22 | NT   | NT   | NT   | 8.27 | NT   | 8.59 | NT   | NT   | 8.13 | NT   | 7.57 | NT   | NT   |
|            |                              | 7 log                 | 7.14                                                  | 7.13 | NT   | NT   | NT   | 7.14 | NT   | 6.40 | NT   | NT   | 5.41 | NT   | 2.14 | NT   | NT   |
|            | DPBS w/ CaMg <sup>2+</sup>   | 9 log                 | 9.41                                                  | 9.07 | NT   | NT   | NT   | 9.26 | NT   | 8.70 | NT   | NT   | 8.39 | NT   | 8.38 | NT   | NT   |
|            |                              | 7 log                 | 7.28                                                  | 7.02 | NT   | NT   | NT   | 7.40 | NT   | 6.44 | NT   | NT   | 4.76 | NT   | 1.49 | NT   | NT   |
|            | DPBS w/o CaMg <sup>2+</sup>  | 9 log                 | 9.45                                                  | 9.13 | NT   | NT   | NT   | 9.43 | NT   | 8.20 | NT   | NT   | 8.36 | NT   | 8.79 | NT   | NT   |
|            |                              | 7 log                 | 7.33                                                  | 7.28 | NT   | NT   | NT   | 6.86 | NT   | 6.49 | NT   | NT   | 5.48 | NT   | 2.70 | NT   | NT   |
| ISP**      | 5% Glucose                   | 8 log                 | 0*                                                    | NA   |
|            |                              | 7 log                 | 0*                                                    | NA   |
|            | 0.9 % NaCl                   | 8 log                 | 8.76                                                  | 8.71 | 8.60 | 8.64 | 8.54 | 8.62 | 8.62 | NT   | 8.06 | NT   | NT   | NT   | NT   | 7.60 | NT   |
|            |                              | 7 log                 | 7.60                                                  | 7.34 | 7.30 | 7.10 | 7.11 | 6.74 | 6.09 | NT   | 5.19 | NT   | NT   | NT   | NT   | NT   | NT   |

|                          |       |      |      |      |      |      |      |      |    |      |    |    |    |    |      |    |
|--------------------------|-------|------|------|------|------|------|------|------|----|------|----|----|----|----|------|----|
| <b>Hartmann's</b>        | 8 log | 8.80 | 8.63 | 8.46 | 8.62 | 8.53 | 8.59 | 8.63 | NT | 8.04 | NT | NT | NT | NT | 7.40 | NT |
| <b>infusion</b>          | 7 log | 7.99 | 7.30 | 7.30 | 7.07 | 7.32 | 6.79 | 6.48 | NT | 4.84 | NT | NT | NT | NT | NT   | NT |
| <b>solution</b>          |       |      |      |      |      |      |      |      |    |      |    |    |    |    |      |    |
| <b>DPBS w/</b>           | 8 log | 8.63 | 8.59 | 8.61 | 8.77 | 8.65 | 8.73 | 8.64 | NT | 8.18 | NT | NT | NT | NT | 7.89 | NT |
| <b>CaMg<sup>2+</sup></b> | 7 log | 7.60 | 7.59 | 7.41 | 7.01 | 7.31 | 6.88 | 6.50 | NT | 4.95 | NT | NT | NT | NT | NT   | NT |
| <b>DPBS w/o</b>          | 8 log | 8.62 | 8.47 | 8.71 | 8.97 | 8.32 | 8.87 | 8.88 | NT | 8.34 | NT | NT | NT | NT | 8.11 | NT |
| <b>CaMg<sup>2+</sup></b> | 7 log | 7.63 | 7.18 | 7.37 | 7.08 | 7.08 | 6.81 | 6.51 | NT | 6.03 | NT | NT | NT | NT | NT   | NT |

\*, no plaques were observed in non-diluted sample, so titer could not be expressed in logs; \* \*, 8.8–8.9 log pfu/ml for phage ISP, NT, not tested; NA, not applicable.

**Table S2:** Stability of ISP phage (9 log pfu/ml) in two different stabilizers after freeze-drying procedure and storage at 4°C.

| stabilizers    | Before lyophilization | After lyophilization | After 3 months | After 12 months | After 17 months | After 27 months | After 8 years | After 126 days of resuspension of 8 years old samples |
|----------------|-----------------------|----------------------|----------------|-----------------|-----------------|-----------------|---------------|-------------------------------------------------------|
| Sucrose 0.3M   | 9.33                  | 7.93                 | 7.93           | 7.94            | 7.90            | 7.92            | 7.99          | 7.72                                                  |
| Sucrose 0.5M   | 9.35                  | 8.72                 | 8.66           | 8.66            | 8.65            | 8.40            | 8.12          | 8.09                                                  |
| Sucrose 0.8M   | 9.35                  | 8.92                 | 8.84           | 8.64            | 8.63            | 8.62            | 7.73          | 8.39                                                  |
| Sucrose 1.0M   | 9.36                  | 8.85                 | 8.81           | 8.71            | 8.71            | 8.69            | 8.55          | 8.31                                                  |
| Trehalose 0.3M | 9.35                  | 8.69                 | 8.61           | 8.61            | 8.56            | 7.68            | 7.24          | 6.80                                                  |
| Trehalose 0.5M | 9.34                  | 8.64                 | 8.60           | 8.62            | 8.62            | 8.36            | 7.60          | 7.24                                                  |
| Trehalose 0.8M | 9.35                  | 8.72                 | 8.72           | 8.71            | 8.69            | 8.65            | 6.92          | 6.41                                                  |
| Trehalose 1.0M | 9.37                  | 8.75                 | 8.75           | 8.72            | 8.71            | 8.70            | 8.30          | 8.21                                                  |

**Table S3:** Stability of resuspended ISP lyophilizates after storage at 4°C.

| Stabilizer | concentration | Log pfu/ml              |      |
|------------|---------------|-------------------------|------|
|            |               | Days after resuspension |      |
|            |               | 0                       | 126  |
| Sucrose    | 0.3 M         | 8.02                    | 7.72 |
|            | 0.5 M         | 8.03                    | 8.09 |
|            | 0.8 M         | 8.75                    | 8.39 |
|            | 1 M           | 8.59                    | 8.31 |
| Trehalose  | 0.3 M         | 7.10                    | 6.80 |
|            | 0.5 M         | 7.61                    | 7.24 |
|            | 0.8 M         | 6.90                    | 6.41 |
|            | 1 M           | 8.30                    | 8.21 |
